# Supplementary material
Source: PubMed Central journal article supplement (PMC3568569)
Supplement: AEM.02736-12_zam999104073so1.pdf [file AEM.02736-12_zam999104073so1.pdf]

**Table S1.** Organisms, cloned homologues of xylose reductase (XR), xylitol dehydrogenase (XDH), and xylulose kinase (XKS) and primer sequences used for cloning into gene expression cassettes. Primers contained the sequences homologous to each gene (underlined), promoters, and terminators.

| Organism                                  | Abbreviation | NCBI accession number | Primer sequence |                                                                            |
|-------------------------------------------|--------------|-----------------------|-----------------|----------------------------------------------------------------------------|
| 1 <i>Aspergillus flavus</i>               | afXR         | XM_002374429          | Fwd             | 5'- TATTTCAAGCTATACCAAGCATACAATCAACTCCA <u>ATGGCTTCTCCACCGTCAAGC</u> -3'   |
|                                           |              |                       | Rev             | 5'- TGGAGACTTGACCAAACCTCTGGCGAAGAAGTCCATTAGAAGATAGGAACGTACATA -3'          |
| 2 <i>Aspergillus nidulans</i>             | anidXR       | XM_652935             | Fwd             | 5'- TATTTCAAGCTATACCAAGCATACAATCAACTCCA <u>ATGTCCCCTCCACCGTCAAAC</u> -3'   |
|                                           |              |                       | Rev             | 5'- TGGAGACTTGACCAAACCTCTGGCGAAGAAGTCCATTAGAAGATAGTGATTGGCAGA -3'          |
| 3 <i>Aspergillus niger</i>                | anXR         | XM_001388767          | Fwd             | 5'- TATTTCAAGCTATACCAAGCATACAATCAACTCCA <u>ATGGCCTCTCCACAGTAAAGC</u> -3'   |
|                                           |              |                       | Rev             | 5'- TGGAGACTTGACCAAACCTCTGGCGAAGAAGTCCACTAGAAAATAGGAGCGTAGAGT -3'          |
| 4 <i>Aspergillus oryzae</i>               | aoXR         | FJ957890              | Fwd             | 5'- TATTTCAAGCTATACCAAGCATACAATCAACTCCA <u>ATGGCTTCTCCACCGTCAAGC</u> -3'   |
|                                           |              |                       | Rev             | 5'- TGGAGACTTGACCAAACCTCTGGCGAAGAAGTCCATTAGAAGATAGGAACGTACATA -3'          |
| 5 <i>Pichia guilliermondii</i>            | pgXR         | AF020040              | Fwd             | 5'- TATTTCAAGCTATACCAAGCATACAATCAACTCCA <u>ATGTCTATTACTTTGAACTCAG</u> -3'  |
|                                           |              |                       | Rev             | 5'- TGGAGACTTGACCAAACCTCTGGCGAAGAAGTCCATTACACAAAAGTTGGAATCTTG -3'          |
| 6 <i>Candida parapsilosis</i>             | cpXR         | XM_002492928          | Fwd             | 5'-TATTTCAAGCTATACCAAGCATACAATCAACTCCA <u>ATGTCTACTGCTACTGCTTCC</u> -3'    |
|                                           |              |                       | Rev             | 5'-GGAGACTTGACCAAACCTCTGGCGAAGAAGTCCATTAACAAAAACTGGAATGTTGGAG-3'           |
| 7 <i>Candida shehatae</i>                 | csXR         | EF042296              | Fwd             | 5'-TATTTCAAGCTATACCAAGCATACAATCAACTCCA <u>ATGAGCCCAAGCCCAATTCCAGC</u> -3'  |
|                                           |              |                       | Rev             | 5'-GGAGACTTGACCAAACCTCTGGCGAAGAAGTCCATTAACGAAGATTGGAATGTTGTCC-3'           |
| 8 <i>Candida tropicalis</i>               | ctXR         | EU273285              | Fwd             | 5'-TATTTCAAGCTATACCAAGCATACAATCAACTCCA <u>ATGTCTACTACTGTTAATACTCC</u> -3'  |
|                                           |              |                       | Rev             | 5'-GGAGACTTGACCAAACCTCTGGCGAAGAAGTCCATTAACAAAAGATTGGAATGTTGTCC-3'          |
| 9 <i>Kluyveromyces lactis</i> NRRL Y-1140 | klXR         | XM_454929             | Fwd             | 5'-TATTTCAAGCTATACCAAGCATACAATCAACTCCA <u>ATGACGTACTTAGCAGAAACAG</u> -3'   |
|                                           |              |                       | Rev             | 5'-GGAGACTTGACCAAACCTCTGGCGAAGAAGTCCATTAGATGAAAGTTGGGAATTCGTTG-3'          |
| 10 <i>Magnaporthe grisea</i> 70-15        | mgXR         | XM_361105             | Fwd             | 5'-TATTTCAAGCTATACCAAGCATACAATCAACTCCA <u>ATGGCGTCGCCAACGATGAAGC</u> -3'   |
|                                           |              |                       | Rev             | 5'-TGGAGACTTGACCAAACCTCTGGCGAAGAAGTCCATCAACCAAAGATCCAGAGCTTG-3'            |
| 11 <i>Pichia guilliermondii</i>           | pgXR         | DQ297454              | Fwd             | 5'- TATTTCAAGCTATACCAAGCATACAATCAACTCCA <u>ATGTCTATTACTTTGAACTCAG</u> -3'  |
|                                           |              |                       | Rev             | 5'- TGGAGACTTGACCAAACCTCTGGCGAAGAAGTCCATTACACAAAAGTTGGAATCTTG -3'          |
| 12 <i>Neurospora crassa</i>               | ncXR         | XM_958838             | Fwd             | 5'-TATTTCAAGCTATACCAAGCATACAATCAACTCCA <u>ATGGTTCTGCTATCAAGCTCAAC</u> -3'  |
|                                           |              |                       | Rev             | 5'-GGAGACTTGACCAAACCTCTGGCGAAGAAGTCCACTAACCGAAAATCCAGAGGTTCTC-3'           |
| 13 <i>Penicillium chrysogenum</i>         | pcXR         | XM_002561226          | Fwd             | 5'- TATTTCAAGCTATACCAAGCATACAATCAACTCCA <u>ATGGTTGCCCTACTGTCAAGC</u> -3'   |
|                                           |              |                       | Rev             | 5'- TGGAGACTTGACCAAACCTCTGGCGAAGAAGTCCATCAATACTCCACGCAAACCAA -3'           |
| 14 <i>Phaeosphaeria nodorum</i> SN15      | pnXR         | XM_001802990          | Fwd             | 5'- TATTTCAAGCTATACCAAGCATACAATCAACTCCA <u>ATGGTTGCCGTCGCTTTTGCC</u> -3'   |
|                                           |              |                       | Rev             | 5'- TGGAGACTTGACCAAACCTCTGGCGAAGAAGTCCACTAAGCGAAGACGTAGCAAGGG -3'          |
| 15 <i>Pichia pastoris</i>                 | ppXR         | XM_002492928          | Fwd             | 5'- TATTTCAAGCTATACCAAGCATACAATCAACTCCA <u>ATGGCTACTCTATTAATAATTGA</u> -3' |

|    |                                                               |                       |              |     |                                                                   |
|----|---------------------------------------------------------------|-----------------------|--------------|-----|-------------------------------------------------------------------|
|    |                                                               |                       |              | Rev | 5'- TGGAGACTTGACCAAACCTCTGGCGAAGAAGTCCACTAGGCAAATATAGGGATCTTG -3' |
| 16 | <i>Podospora anserine</i>                                     | paXR                  | XM_001912551 | Fwd | 5'- TATTTCAAGCTATACCAAGCATACAATCAACTCCAATGGCCCCCGTCATCAAGCTCA -3' |
|    |                                                               |                       |              | Rev | 5'- TGGAGACTTGACCAAACCTCTGGCGAAGAAGTCCATTAGCCAAAGATCCAGAGGAGC -3' |
| 17 | <i>Scheffersomyces stipitis</i><br>( <i>Pichia stipitis</i> ) | psXR                  | XM_001385144 | Fwd | 5'-TATTTCAAGCTATACCAAGCATACAATCAACTCCAATGCCTTCTATTAAGTTGAACTC-3'  |
|    |                                                               |                       |              | Rev | 5'-GGAGACTTGACCAAACCTCTGGCGAAGAAGTCCATTAGACGAAGATAGGAATCTTGTC-3'  |
| 18 | <i>Scheffersomyces stipitis-mutant</i>                        | psXR-mut <sup>a</sup> | XM_001385144 | Fwd | 5'-TATTTCAAGCTATACCAAGCATACAATCAACTCCAATGCCTTCTATTAAGTTGAACTC-3'  |
|    |                                                               |                       |              | Rev | 5'-GGAGACTTGACCAAACCTCTGGCGAAGAAGTCCATTAGACGAAGATAGGAATCTTGTC-3'  |
| 19 | <i>Talaromyces stipitatus</i>                                 | tsXR                  | XM_002484006 | Fwd | 5'- TATTTCAAGCTATACCAAGCATACAATCAACTCCAATGTCTTCTCCCACCGTCAAGC -3' |
|    |                                                               |                       |              | Rev | 5'- TGGAGACTTGACCAAACCTCTGGCGAAGAAGTCCACTATGCGAAAATAGGAATGTAG -3' |
| 20 | <i>Zygosaccharomyces rouxii</i>                               | zrXR                  | XM_002494601 | Fwd | 5'- TATTTCAAGCTATACCAAGCATACAATCAACTCCAATGGCAAGTGTGGTCGCTTTGA -3' |
|    |                                                               |                       |              | Rev | 5'- TGGAGACTTGACCAAACCTCTGGCGAAGAAGTCCACTAATCAAAAATAGGAATGGA -3'  |

Continued (Table S1)

| Organism                                   | Abbreviation           | NCBI accession number | Primer sequences |                                                                    |
|--------------------------------------------|------------------------|-----------------------|------------------|--------------------------------------------------------------------|
| 1 <i>Arxula adenivorans</i>                | aaXDH                  | AJ748124              | Fwd              | 5'- AGTAATTATCTACTTTTTACAACAAATATAAAACAATGGCTGCACAAGTCGAGGAAC -3'  |
|                                            |                        |                       | Rev              | 5'- CGTGAATGTAAGCGTGACATAACTAATTACATGATTTACTCAGGTCCATCAATAATC -3'  |
| 2 <i>Aspergillus nidulans</i>              | anidXDH                | BN001306              | Fwd              | 5'- AGTAATTATCTACTTTTTACAACAAATATAAAACAATGAGCTCACAGACCCCAACAG -3'  |
|                                            |                        |                       | Rev              | 5'- CGTGAATGTAAGCGTGACATAACTAATTACATGATTTATGCGGCGCCAGGGCCAGCA -3'  |
| 3 <i>Aspergillus niger</i>                 | anXDH                  | AJ854041              | Fwd              | 5'- AGTAATTATCTACTTTTTACAACAAATATAAAACAATGAGCACCCAGAACACCAA -3'    |
|                                            |                        |                       | Rev              | 5'- CGTGAATGTAAGCGTGACATAACTAATTACATGATCTATGAATCGACACCAGCAA -3'    |
| 4 <i>Aspergillus oryzae</i>                | aoXDH                  | AB109101              | Fwd              | 5'- AGTAATTATCTACTTTTTACAACAAATATAAAACAATGGGTGCGCCACCCAAAACCG -3'  |
|                                            |                        |                       | Rev              | 5'- CGTGAATGTAAGCGTGACATAACTAATTACATGATTCATACATCAACACCAGCAAT -3'   |
| 5 <i>Candida albicans</i>                  | caXDH                  | XM_714341             | Fwd              | 5'- AGTAATTATCTACTTTTTACAACAAATATAAAACAATGACAAACCCTTCTTTAGTG -3'   |
|                                            |                        |                       | Rev              | 5'- CGTGAATGTAAGCGTGACATAACTAATTACATGATTTATTCTGGGCCATCGATTAAC -3'  |
| 6 <i>Candida dubliniensis</i> CD36         | cdXDH                  | XM_002420506          | Fwd              | 5'- AGTAATTATCTACTTTTTACAACAAATATAAAACAATGTCAATTCCAGCTTCAAT -3'    |
|                                            |                        |                       | Rev              | 5'- CGTGAATGTAAGCGTGACATAACTAATTACATGATTCAACTGGTCAAATCAAAAA -3'    |
| 7 <i>Candida shehatae</i>                  | csXDH                  | FJ040172              | Fwd              | 5'-AGTAATTATCTACTTTTTACAACAAATATAAAACAATGACTGCTAACCCCTTCGCTC -3'   |
|                                            |                        |                       | Rev              | 5'-CGTGAATGTAAGCGTGACATAACTAATTACATGATCTATTCCAGGGCCATCAATGA -3'    |
| 8 <i>Candida tropicalis</i>                | ctXDH                  | DQ220745              | Fwd              | 5'-AGTAATTATCTACTTTTTACAACAAATATAAAACAATGACTGCAAACCCATCATT -3'     |
|                                            |                        |                       | Rev              | 5'-CGTGAATGTAAGCGTGACATAACTAATTACATGATCTATTCTGGACCATCAATTA -3'     |
| 9 <i>Trichoderma longibrachiatum</i>       | tlXDH                  | AF428150              | Fwd              | 5'- AGTAATTATCTACTTTTTACAACAAATATAAAACAATGGCGACTCAAACGATCAACA -3'  |
|                                            |                        |                       | Rev              | 5'- CGTGAATGTAAGCGTGACATAACTAATTACATGATTTACACCTTCTCGTTGGGCCCG -3'  |
| 10 <i>Kluyveromyces lactis</i> NRRL Y-1140 | kIXDH                  | XM_453306             | Fwd              | 5'- AGTAATTATCTACTTTTTACAACAAATATAAAACAATGTCAGGCACACAAAAGGCGG -3'  |
|                                            |                        |                       | Rev              | 5'- CGTGAATGTAAGCGTGACATAACTAATTACATGATCTATTCCGGGCCATCGATCATT -3'  |
| 11 <i>Pichia guilliermondii</i>            | pgXDH                  | XM_001481913.1        | Fwd              | 5'- AGTAATTATCTACTTTTTACAACAAATATAAAACAATGCTTTGTAATTTTACTTCAA -3'  |
|                                            |                        |                       | Rev              | 5'- CGTGAATGTAAGCGTGACATAACTAATTACATGATTTACTCGGGACCATCTATAATA -3'  |
| 12 <i>Nectria haematococca</i>             | nhXDH                  | XM_003053919.1        | Fwd              | 5'- AGTAATTATCTACTTTTTACAACAAATATAAAACAATGGCCAGCAACCTGTCTTTC -3'   |
|                                            |                        |                       | Rev              | 5'- CGTGAATGTAAGCGTGACATAACTAATTACATGATTTACTCCTCATTGGGACCCCTTG -3' |
| 13 <i>Neurospora crassa</i>                | ncXDH                  | XM_959714.1           | Fwd              | 5'- AGTAATTATCTACTTTTTACAACAAATATAAAACAATGGCTACCGACGGCAAGTCTA -3'  |
|                                            |                        |                       | Rev              | 5'- CGTGAATGTAAGCGTGACATAACTAATTACATGATTTAGCAGCAGCCAGAACCACCG -3'  |
| 14 <i>Neurospora crassa-mutant</i>         | ncXDH-mut <sup>b</sup> | XM_959714.1           | Fwd              | 5'- AGTAATTATCTACTTTTTACAACAAATATAAAACAATGGCTACCGACGGCAAGTCTA -3'  |
|                                            |                        |                       | Rev              | 5'- CGTGAATGTAAGCGTGACATAACTAATTACATGATTTAGCAGCAGCCAGAACCACCG -3'  |
| 15 <i>Pachysolen tannophilus</i>           | ptXDH                  | ACD81475.1            | Fwd              | 5'- AGTAATTATCTACTTTTTACAACAAATATAAAACAATGCATGGAAAGGTGATTGGCC -3'  |
|                                            |                        |                       | Rev              | 5'- CGTGAATGTAAGCGTGACATAACTAATTACATGATTTACCTTGAAGTATCAACAACG -3'  |
| 16 <i>Penicillium chrysogenum</i>          | pcXDH                  | XM_002568139          | Fwd              | 5'- AGTAATTATCTACTTTTTACAACAAATATAAAACAATGGCCACAGCTCAGGTAGA -3'    |
|                                            |                        |                       | Rev              | 5'- CGTGAATGTAAGCGTGACATAACTAATTACATGATTTACACATCAATACCACCAA -3'    |

|    |                                                               |       |              |     |                                                                      |
|----|---------------------------------------------------------------|-------|--------------|-----|----------------------------------------------------------------------|
| 17 | <i>Phaeosphaeria nodorum</i> SN15                             | pnXDH | XM_001801582 | Fwd | 5'- AGTAATTATCTACTTTTTACAACAAATATAAAACAATGACGACAAAGACAGCTAC-3'       |
|    |                                                               |       |              | Rev | 5'- CGTGAATGTAAGCGTGACATAACTAATTACATGATTCACTCCTCAGGTCCTCAATAAG-3'    |
| 18 | <i>Pichia angusta</i>                                         | paXDH | AB185335     | Fwd | 5'- AGTAATTATCTACTTTTTACAACAAATATAAAACAATGAAAGGTTTACTTTATTACG-3'     |
|    |                                                               |       |              | Rev | 5'- CGTGAATGTAAGCGTGACATAACTAATTACATGATTTAGGAAACCTCGTTCGGCGTC-3'     |
| 19 | <i>Pichia pastoris</i> GS115                                  | ppXDH | XM_002489888 | Fwd | 5'- AGTAATTATCTACTTTTTACAACAAATATAAAACAATGTCCGATAACCCAAGTGT-3'       |
|    |                                                               |       |              | Rev | 5'- CGTGAATGTAAGCGTGACATAACTAATTACATGATTTACTCTGGGCCGTCATGATAG-3'     |
| 20 | <i>Scheffersomyces stipitis</i><br>( <i>Pichia stipitis</i> ) | psXDH | X55392.1     | Fwd | 5'-AGTAATTATCTACTTTTTACAACAAATATAAAACAATGACTGCTAACCCCTTCCTTG-3'      |
|    |                                                               |       |              | Rev | 5'- CGTGAATGTAAGCGTGACATAACTAATTACATGATTTACTCAGGGCCGTCATGAG-3'       |
| 21 | <i>Talaromyces stipitatus</i>                                 | tsXDH | XM_002488189 | Fwd | 5'- AGTAATTATCTACTTTTTACAACAAATATAAAACAATGTCTCTCACGGAACCAA -3'       |
|    |                                                               |       |              | Rev | 5'- CGTGAATGTAAGCGTGACATAACTAATTACATGATTTACAAACCCACAATGATAG -3'      |
| 22 | <i>Zygosaccharomyces rouxii</i>                               | zrXDH | XM_002497263 | Fwd | 5'- AGTAATTATCTACTTTTTACAACAAATATAAAACAATGACAAAGCAAGACGCAATTGTTTC-3' |
|    |                                                               |       |              | Rev | 5'- CGTGAATGTAAGCGTGACATAACTAATTACATGATTTATTCTGGGCCGGTGATAATG-3'     |

Continued (Table S1)

| Organism                                                         | Abbreviation | NCBI accession number | Primer sequences |                                                                     |
|------------------------------------------------------------------|--------------|-----------------------|------------------|---------------------------------------------------------------------|
| 1 <i>Aspergillus flavus</i>                                      | afXKS        | XM_002383656          | Fwd              | 5'- AAGACACCAATCAAAACAAATAAAACATCATCACAATGCAAGGCCCATTTGTACATC -3'   |
|                                                                  |              |                       | Rev              | 5'- TAAAGTCAATCATTTGGCAAGCTTCTCAGCAAACCTCACC GCGTCTCACCTCCTG -3'    |
| 2 <i>Aspergillus fumigatus Af293</i>                             | afugXKS      | XM_748563             | Fwd              | 5'- AAGACACCAATCAAAACAAATAAAACATCATCACAATGACTTCTCAGGGCCCTCTATAC -3' |
|                                                                  |              |                       | Rev              | 5'- TAAAGTCAATCATTTGGCAAGCTTCTCAGCAAACCTATTTCTGGCTGCCTCCTG -3'      |
| 3 <i>Aspergillus nidulans</i>                                    | anidXKS      | XM_676967             | Fwd              | 5'- AAGACACCAATCAAAACAAATAAAACATCATCACAATGTCCTCGCGCTCCTCTTCTC -3'   |
|                                                                  |              |                       | Rev              | 5'- TAAAGTCAATCATTTGGCAAGCTTCTCAGCAAACCTATTTCTTCCCTCCTGCTC -3'      |
| 4 <i>Aspergillus niger</i>                                       | anXKS        | XM_001391360          | Fwd              | 5'- AAGACACCAATCAAAACAAATAAAACATCATCACAATGCAAGGTCCTCTATACATC -3'    |
|                                                                  |              |                       | Rev              | 5'- TAAAGTCAATCATTTGGCAAGCTTCTCAGCAAACCTCAGTGCTTCCCTTCTG -3'        |
| 5 <i>Aspergillus oryzae</i>                                      | aoXKS        | XM_001824842          | Fwd              | 5'- AAGACACCAATCAAAACAAATAAAACATCATCACAATGCAAGGCCCATTTGTACATC -3'   |
|                                                                  |              |                       | Rev              | 5'- TAAAGTCAATCATTTGGCAAGCTTCTCAGCAAACCTCACC GGTCTCACCTCCTG -3'     |
| 6 <i>Candida albicans</i>                                        | caXKS        | XM_706361.1           | Fwd              | 5'-CAAGACACCAATCAAAACAAATAAAACATCATCACAATGTACAGTTTCACTTTCACTATC-3'  |
|                                                                  |              |                       | Rev              | 5'-AAGTCAATCATTTGGCAAGCTTCTCAGCAAACCTCAAATAATTTTCCAATATATTC-3'      |
| 7 <i>Candida dubliniensis CD36</i>                               | cdXKS        | XM_002420098.1        | Fwd              | 5'-CAAGACACCAATCAAAACAAATAAAACATCATCACAATGACCGATTATTCTAATTC-3'      |
|                                                                  |              |                       | Rev              | 5'-AAGTCAATCATTTGGCAAGCTTCTCAGCAAACCTATTGTTTTAACAAATGTTTCTTCC-3'    |
| 8 <i>Candida tropicalis</i>                                      | ctXKS        | XP_002549576          | Fwd              | 5'-CAAGACACCAATCAAAACAAATAAAACATCATCACAATGACTACTGATTATTCTGAAAAAC-3' |
|                                                                  |              |                       | Rev              | 5'-AAGTCAATCATTTGGCAAGCTTCTCAGCAAACCTTATTGTTTTAATAAAGTCTCTTCC-3'    |
| 9 <i>Kluyveromyces lactis NRRL Y-1140</i>                        | kIXKS        | XM_454390             | Fwd              | 5'- AAGACACCAATCAAAACAAATAAAACATCATCACAATGAGTGAATCAGGTTATTATTAG -3' |
|                                                                  |              |                       | Rev              | 5'- TAAAGTCAATCATTTGGCAAGCTTCTCAGCAAACCTTAGTGTGATGACGCTTCTC -3'     |
| 10 <i>Pichia guilliermondii</i>                                  | pgXKS        | XM_001482293          | Fwd              | 5'- AAGACACCAATCAAAACAAATAAAACATCATCACAATGACTTCTAAATCCTCAGCTA -3'   |
|                                                                  |              |                       | Rev              | 5'- TAAAGTCAATCATTTGGCAAGCTTCTCAGCAAACCTAATCATGCTTCAAATTCTC-3'      |
| 11 <i>Nectria haematococca</i>                                   | nhXKS        | XM_003048919          | Fwd              | 5'- AAGACACCAATCAAAACAAATAAAACATCATCACAATGCCTTTCTTGGCTCGATC -3'     |
|                                                                  |              |                       | Rev              | 5'- TAAAGTCAATCATTTGGCAAGCTTCTCAGCAAACCTTAAACCTTTTCTCTGAAC -3'      |
| 12 <i>Neurospora crassa</i>                                      | ncXKS        | XM_001728085          | Fwd              | 5'-CAAGACACCAATCAAAACAAATAAAACATCATCACAATGGACGTTCAAGCAATCGTAATC-3'  |
|                                                                  |              |                       | Rev              | 5'-AAGTCAATCATTTGGCAAGCTTCTCAGCAAACCTTACTTATTCTCGCCACCTCC-3'        |
| 13 <i>Penicillium chrysogenum</i>                                | pcXKS        | XM_002557373          | Fwd              | 5'-CAAGACACCAATCAAAACAAATAAAACATCATCACAATGGCATCAGACAGTCCCCTCTAC-3'  |
|                                                                  |              |                       | Rev              | 5'-AAGTCAATCATTTGGCAAGCTTCTCAGCAAACCTCAGTAATCATCTCCATCGCCCTTC-3'    |
| 14 <i>Pichia pastoris GS115</i>                                  | ppXKS        | XM_002489890          | Fwd              | 5'-CAAGACACCAATCAAAACAAATAAAACATCATCACAATGGTTACCAAAGAAATCC-3'       |
|                                                                  |              |                       | Rev              | 5'-AAGTCAATCATTTGGCAAGCTTCTCAGCAAACCTTACTTCTCTAGAGTTTGTCTATTTC-3'   |
| 15 <i>Scheffersomyces stipitis</i><br>( <i>Pichia stipitis</i> ) | psXKS        | AF127802              | Fwd              | 5'-CAAGACACCAATCAAAACAAATAAAACATCATCACAATGACCACTACCCCATTTGATGC-3'   |
|                                                                  |              |                       | Rev              | 5'-AAGTCAATCATTTGGCAAGCTTCTCAGCAAACCTTAGTGTTCATTCACCTTCCATC-3'      |
| 16 <i>Podospora anserine</i>                                     | paXKS        | XM_001907740          | Fwd              | 5'- AAGACACCAATCAAAACAAATAAAACATCATCACAATGACCGACAACGGACCCCTTT -3'   |
|                                                                  |              |                       | Rev              | 5'- TAAAGTCAATCATTTGGCAAGCTTCTCAGCAAACCTACGTATTCTTCGCAACTTTC -3'    |

|    |                                 |       |              |     |                                                                     |
|----|---------------------------------|-------|--------------|-----|---------------------------------------------------------------------|
| 17 | <i>Saccharomyces cerevisiae</i> | scXKS | AAFW02000100 | Fwd | 5'-CAAGACACCAATCAAACAATAAAACATCATCACAATGTTGTGTTTCAGTAATTCAAAG-3'    |
|    |                                 |       |              | Rev | 5'-AAGTCAATCATTTGGCAAGCTTCTCAGCAAACCTTAGATGAGAGTCTTTTCCAG-3'        |
| 18 | <i>Talaromyces stipitatus</i>   | tsXKS | XM_002484215 | Fwd | 5'- AAGACACCAATCAAACAATAAAACATCATCACAATGGCACCCGGGCCGTTGTATATC -3'   |
|    |                                 |       |              | Rev | 5'- TAAAGTCAATCATTTGGCAAGCTTCTCAGCAAACCTGATTCTTGAATCTGCTGACATC -3'  |
| 19 | <i>Zygosaccharomyces rouxii</i> | zrXKS | XM_002498463 | Fwd | 5'- AAGACACCAATCAAACAATAAAACATCATCACAATGACTGAAACCAACGATTCATTC -3'   |
|    |                                 |       |              | Rev | 5'- TAAAGTCAATCATTTGGCAAGCTTCTCAGCAAACCTCAATGCTTTGGTAATGATGCTTC -3' |

<sup>a</sup> Engineered xylose reductase (K270R mutant) for altered cofactor specificity from NADPH to NADH (2)

<sup>b</sup> Engineered xylitol dehydrogenase (D211S/I212R/S348T triple mutant) for altered cofactor specificity from NAD<sup>+</sup> to NADP<sup>+</sup> (1)

**Table S2.** Primer sequences used to amplify the assembly fragments from the expression cassettes.

| Gene                  | Annealing region |     | Sequence                         |
|-----------------------|------------------|-----|----------------------------------|
| Xylose reductase      | ADH1p            | Fwd | 5'- CGAGGTGCCGTAAAGCACTAAATC -3' |
|                       | ADH1t            | Rev | 5'- GAGAGAGTAACAGTACGATCG -3'    |
| Xylitol dehydrogenase | PGK1p            | Fwd | 5'- TGGACTTCTTCGCCAGAGGTTTG -3'  |
|                       | CYC1t            | Rev | 5'- CGTTGCGAGAGATGGAAAAC -3'     |
| Xylulose kinase       | PYK1p            | Fwd | 5'- ATCATGTAATTAGTTATGTCACG -3'  |
|                       | HXT7t            | Rev | 5'- GGAAGCGGAAGAGCGCCCAATACG -3' |

**Table S3.** Combinations of the three xylose pathway genes in randomly picked 16 and 12 clones from two independent test libraries.

| Clone # | XR                       | XDH                   | XKS                   |
|---------|--------------------------|-----------------------|-----------------------|
| 1       | <i>K. lactis</i>         | <i>P. tannophilus</i> | <i>S. stipitis</i>    |
| 2       | <i>N. crassa</i>         | <i>A. oryzae</i>      | <i>S. stipitis</i>    |
| 3       | <i>A. oryzae</i>         | <i>C. tropicalis</i>  | <i>S. stipitis</i>    |
| 4       | <i>A. oryzae</i>         | <i>C. tropicalis</i>  | <i>P. chrysogenum</i> |
| 5       | <i>C. tropicalis</i>     | <i>P. tannophilus</i> | <i>P. chrysogenum</i> |
| 6       | <i>K. lactis</i>         | <i>T. stipitatus</i>  | <i>S. stipitis</i>    |
| 7       | <i>P. guilliermondii</i> | <i>T. stipitatus</i>  | <i>A. niger</i>       |
| 8       | <i>N. crassa</i>         | <i>N. crassa</i>      | <i>S. Stipitis</i>    |
| 9       | <i>P. guilliermondii</i> | <i>T. stipitatus</i>  | <i>P. chrysogenum</i> |
| 10      | <i>N. crassa</i>         | <i>C. shehatae</i>    | <i>C. tropicalis</i>  |
| 11      | <i>K. lactis</i>         | <i>A. oryzae</i>      | <i>S. stipitis</i>    |
| 12      | <i>A. oryzae</i>         | <i>K. lactis</i>      | <i>P. chrysogenum</i> |
| 13      | <i>S. stipitis</i>       | <i>S. stipitis</i>    | <i>P. chrysogenum</i> |
| 14      | <i>S. stipitis</i>       | <i>K. lactis</i>      | <i>P. chrysogenum</i> |
| 15      | <i>C. shehatae</i>       | <i>C. tropicalis</i>  | <i>A. niger</i>       |
| 16      | <i>K. lactis</i>         | <i>S. stipitis</i>    | <i>A. niger</i>       |
| 17      | <i>A. oryzae</i>         | <i>P. tannophilus</i> | <i>C. albicans</i>    |
| 18      | <i>S. stipitis</i>       | <i>S. stipitis</i>    | <i>P. chrysogenum</i> |
| 19      | <i>A. oryzae</i>         | <i>N. crassa</i>      | <i>P. chrysogenum</i> |
| 20      | <i>P. guilliermondii</i> | <i>C. shehatae</i>    | <i>P. chrysogenum</i> |
| 21      | <i>K. lactis</i>         | <i>C. tropicalis</i>  | <i>P. chrysogenum</i> |
| 22      | <i>A. oryzae</i>         | <i>S. stipitis</i>    | <i>P. chrysogenum</i> |
| 23      | <i>A. oryzae</i>         | <i>K. lactis</i>      | <i>A. niger</i>       |
| 24      | <i>S. stipitis</i>       | <i>N. crassa</i>      | <i>A. niger</i>       |
| 25      | <i>A. oryzae</i>         | <i>S. stipitis</i>    | <i>P. chrysogenum</i> |
| 26      | <i>K. lactis</i>         | <i>C. shehatae</i>    | <i>P. chrysogenum</i> |
| 27      | <i>S. stipitis</i>       | <i>A. oryzae</i>      | <i>P. chrysogenum</i> |
| 28      | <i>K. lactis</i>         | <i>K. lactis</i>      | <i>S. cerevisiae</i>  |

**Table S4.** Combinations of the three xylose pathway genes in the 10 fast and selected slow growers of each strain screened by the growth rate on xylose. “F” – fast grower, “S” – slow grower.

|                  | XR                              | XDH                             | XKS                             |
|------------------|---------------------------------|---------------------------------|---------------------------------|
| <b>INVSc1</b>    |                                 |                                 |                                 |
| F1               | <i>Aspergillus nidulans</i>     | <i>Scheffersomyces stipitis</i> | <i>Podospora anserina</i>       |
| F2               | <i>Aspergillus nidulans</i>     | <i>Candida albicans</i>         | <i>Saccharomyces cerevisiae</i> |
| F3               | <i>Scheffersomyces stipitis</i> | <i>Pichia pastoris</i>          | <i>Podospora anserina</i>       |
| F4               | <i>Neurospora crassa</i>        | <i>Zygosaccharomyces rouxii</i> | <i>Aspergillus niger</i>        |
| F5               | <i>Zygosaccharomyces rouxii</i> | <i>Arxula adenivorans</i>       | <i>Kluyveromyces lactis</i>     |
| F6               | <i>Aspergillus nidulans</i>     | <i>Scheffersomyces stipitis</i> | <i>Podospora anserina</i>       |
| F7               | <i>Neurospora crassa</i>        | <i>Arxula adenivorans</i>       | <i>Saccharomyces cerevisiae</i> |
| F8               | <i>Neurospora crassa</i>        | <i>Neurospora crassa</i>        | <i>Aspergillus niger</i>        |
| F9               | <i>Zygosaccharomyces rouxii</i> | <i>Zygosaccharomyces rouxii</i> | <i>Aspergillus nidulans</i>     |
| F10              | <i>Scheffersomyces stipitis</i> | <i>Aspergillus oryzae</i>       | <i>Nectria haematococca</i>     |
| <b>ATCC 4124</b> |                                 |                                 |                                 |
| F1               | <i>Aspergillus flavus</i>       | <i>Podospora anserine</i>       | <i>Aspergillus flavus</i>       |
| F2               | <i>Pichia guilliermondii</i>    | <i>Pencillium chrysogenum</i>   | <i>Aspergillus oryzae</i>       |
| F3               | <i>Neurospora crassa</i>        | <i>Aspergillus oryzae</i>       | <i>Pichia pastoris</i>          |
| F4               | <i>Aspergillus niger</i>        | <i>Aspergillus niger</i>        | <i>Zygosaccharomyces rouxii</i> |
| F5               | <i>Aspergillus flavus</i>       | <i>Scheffersomyces stipitis</i> | <i>Pichia guilliermondii</i>    |
| F6               | <i>Aspergillus nidulans</i>     | <i>Aspergillus nidulans</i>     | <i>Kluyveromyces lactis</i>     |
| F7               | <i>Aspergillus flavus</i>       | <i>Zygosaccharomyces rouxii</i> | <i>Kluyveromyces lactis</i>     |
| F8               | <i>Aspergillus nidulans</i>     | <i>Candida dubliniensis</i>     | <i>Zygosaccharomyces rouxii</i> |
| F9               | <i>Talaromyces stipitatus</i>   | <i>Kluyveromyces lactis</i>     | <i>Zygosaccharomyces rouxii</i> |
| F10              | <i>Aspergillus flavus</i>       | <i>Scheffersomyces stipitis</i> | <i>Zygosaccharomyces rouxii</i> |
| <b>CTY</b>       |                                 |                                 |                                 |
| F1               | <i>Aspergillus flavus</i>       | <i>Candida dubliniensis</i>     | <i>Nectria haematococca</i>     |
| F2               | <i>Aspergillus flavus</i>       | <i>Candida dubliniensis</i>     | <i>Saccharomyces cerevisiae</i> |
| F3               | <i>Aspergillus nidulans</i>     | <i>Aspergillus niger</i>        | <i>Pencillium chrysogenum</i>   |
| F4               | <i>Aspergillus flavus</i>       | <i>Aspergillus niger</i>        | <i>Aspergillus niger</i>        |
| F5               | <i>Neurospora crassa</i>        | <i>Aspergillus niger</i>        | <i>Zygosaccharomyces rouxii</i> |
| F6               | <i>Aspergillus flavus</i>       | <i>Candida shehatae</i>         | <i>Nectria haematococca</i>     |
| F7               | <i>Aspergillus flavus</i>       | <i>Aspergillus oryzae</i>       | <i>Aspergillus niger</i>        |
| F8               | <i>Aspergillus flavus</i>       | <i>Aspergillus niger</i>        | <i>Candida tropicalis</i>       |
| F9               | <i>Aspergillus flavus</i>       | <i>Pichia guilliermondii</i>    | <i>Candida dubliniensis</i>     |
| F10              | <i>Talaromyces stipitatus</i>   | <i>Candida shehatae</i>         | <i>Candida dubliniensis</i>     |



Continued (Table S4)

|                 | XR                              | XDH                             | XKS                          |
|-----------------|---------------------------------|---------------------------------|------------------------------|
| INVSc1          |                                 |                                 |                              |
| S1 <sup>b</sup> | <i>Neurospora crassa</i>        | <i>Aspergillus nidulans</i>     | n.a. <sup>a</sup>            |
| S5              | <i>Aspergillus flavus</i>       | <i>Neurospora crassa</i>        | <i>Aspergillus fumigatus</i> |
| S10             | <i>Pichia guilliermondii</i>    | <i>Candida shehatae</i>         | <i>Podospora anserina</i>    |
| ATCC 4124       |                                 |                                 |                              |
| S1              | <i>Zygosaccharomyces rouxii</i> | <i>Candida shehatae</i>         | <i>Pichia guilliermondii</i> |
| S5              | <i>Pichia guilliermondii</i>    | <i>Zygosaccharomyces rouxii</i> | <i>Kluyveromyces lactis</i>  |
| S8              | <i>Candida shehatae</i>         | <i>Candida shehatae</i>         | <i>Aspergillus oryzae</i>    |
| S10             | <i>Scheffersomyces stipitis</i> | <i>Scheffersomyces stipitis</i> | <i>Nectria haematococca</i>  |
| CTY             |                                 |                                 |                              |
| S1              | <i>Candida dubliensis</i>       | <i>Nectria haematococca</i>     | <i>Aspergillus niger</i>     |
| S5              | <i>Zygosaccharomyces rouxii</i> | <i>Aspergillus niger</i>        | <i>Nectria haematococca</i>  |
| S10             | <i>Candida dubliensis</i>       | <i>Scheffersomyces stipitis</i> | <i>Podospora anserina</i>    |

<sup>a</sup> n.a.: could not be sequenced correctly.

**Table S5.** Enzyme activities of XR, XDH, and XKS homologues in the INVSc1 strain

|                  | Specific activity<br>(U/mg protein) |                                 |           | Specific activity<br>(U/mg protein) |        |         | Specific activity<br>(U/mg protein) |        |
|------------------|-------------------------------------|---------------------------------|-----------|-------------------------------------|--------|---------|-------------------------------------|--------|
|                  | Average <sup>a</sup>                | Stdev <sup>b</sup>              |           | Average                             | Stdev  |         | Average                             | Stdev  |
| neg <sup>c</sup> | 0.0078                              | 0.0021                          | neg       | 0.0009                              | 0.0001 | Neg     | 0.0279                              | 0.0135 |
| afXR             | 0.0211                              | 0.0029                          | aaXDH     | 0.0199                              | 0.0012 | afXKS   | 0.0218                              | 0.0055 |
| anidXR           | 0.0344                              | 0.0012                          | anidXDH   | 0.0915                              | 0.0032 | afugXKS | 0.0075                              | 0.0195 |
| anXR             | 0.0269                              | 0.0013                          | anXDH     | 0.1546                              | 0.0073 | anXKS   | -0.0080                             | 0.0072 |
| aoXR             | 0.0151                              | 0.0030                          | aoXHD     | 0.0669                              | 0.0091 | anidXKS | -0.0200                             | 0.0069 |
| pgXR             | -0.0022                             | 0.0050                          | caXDH     | 0.2230                              | 0.0280 | aoXKS   | 0.0967                              | 0.0122 |
| cpXR             | 0.0829                              | 0.0026                          | cdXDH     | 0.1658                              | 0.0131 | bfXKS   | -0.0004                             | 0.0011 |
| csXR             | 0.0930<br>(0.0858) <sup>d</sup>     | 0.0145<br>(0.0043) <sup>d</sup> | csXDH     | 0.1982                              | 0.0042 | caXKS   | -0.0047                             | 0.0142 |
| ctXR             | 0.1120                              | 0.0111                          | ctXDH     | 0.2392                              | 0.0020 | cdXKS   | 0.1520                              | 0.0301 |
| klXR             | 0.0665                              | 0.0080                          | klXDH     | 0.0289                              | 0.0016 | ctXKS   | 0.2266                              | 0.0031 |
| mgXR             | -0.0005                             | 0.0020                          | ncXDH     | 0.0900                              | 0.0047 | klXKS   | 0.0965                              | 0.0065 |
| paXR             | -0.0015                             | 0.0022                          | ncXDH-mut | 0.0010                              | 0.0001 | ncXKS   | 0.0132                              | 0.0030 |
| pcXR             | -0.0001                             | 0.0017                          | nhXDH     | 0.1968                              | 0.0113 | nhXKS   | 0.0329                              | 0.0005 |
| pgXR             | 0.1106                              | 0.0242                          | paXDH     | 0.0755                              | 0.0083 | paXKS   | 0.0549                              | 0.0015 |
| pnXR             | 0.0752                              | 0.0116                          | pcXDH     | -0.0002                             | 0.0001 | pcXKS   | 0.0595                              | 0.0020 |
| pnXR             | 0.0922                              | 0.0050                          | pgXDH     | 0.0127                              | 0.0004 | pgXKS   | 0.2477                              | 0.1468 |
| ppXR             | 0.0200                              | 0.0000                          | pnXDH     | 0.0759                              | 0.0020 | pnXKS   | 0.2910                              | 0.1624 |
| psXR             | 0.1080                              | nd <sup>e</sup>                 | ppXDH     | 0.0518                              | 0.0012 | psXKS   | 0.1930                              | 0.0483 |
| psXR-mut         | 0.0469<br>(0.0755) <sup>d</sup>     | 0.0108<br>(0.0058) <sup>d</sup> | psXDH     | 0.2286                              | 0.0132 | scXKS   | 0.2236                              | 0.0795 |
| tsXR             | 0.0129                              | 0.0014                          | ptXDH     | 0.0001                              | 0.0001 | tsXKS   | 0.0567                              | 0.0045 |
| zrXR             | 0.0117                              | 0.0022                          | tlXDH     | 0.1264                              | 0.0052 | zrXKS   | 0.2071                              | 0.0044 |
|                  |                                     |                                 | tsXDH     | 0.1019                              | 0.0033 |         |                                     |        |
|                  |                                     |                                 | zrXDH     | 0.1569                              | 0.0034 |         |                                     |        |

<sup>a, b</sup> Average and standard deviation (Stdev) (n = 2)

<sup>c</sup> Negative control indicates background enzyme activities measured in the cells transformed with an empty vector. All enzyme activities were reported after subtraction with negative control.

<sup>d</sup> Values in the parenthesis indicate the activities with NADH

<sup>e</sup> Not determined (n = 1)

**Table S6.** Xylose and mixed sugar fermentation properties of the screened recombinants and comparison with the strains reported in literature.

| Xylose (40 or 45 g/L) |              |                                                           |                              |                                 |                          |                                      |                                     |                                     |                                      |            |
|-----------------------|--------------|-----------------------------------------------------------|------------------------------|---------------------------------|--------------------------|--------------------------------------|-------------------------------------|-------------------------------------|--------------------------------------|------------|
| Host strain           | Strain       | Genotype                                                  | OD <sub>0</sub> <sup>a</sup> | Sugar consumption rate (g/L/hr) | Final biomass (cdw, g/L) | Y <sub>etoh</sub> <sup>b</sup> (g/g) | Y <sub>xyI</sub> <sup>c</sup> (g/g) | Y <sub>gly</sub> <sup>d</sup> (g/g) | Y <sub>acet</sub> <sup>e</sup> (g/g) | Reference  |
| D452-2                | MA-D4        |                                                           | ~15                          | 0.56                            | 4.5                      | 0.35                                 | 0.08                                | na <sup>f</sup><br>(<3 g/L)         | na<br>(<0.8 g/L)                     |            |
| INVSc1                | MA-N4        | psXR, psXDH, scXKS1<br>single-copy integration            | ~15                          | 0.56                            | 4.5                      | 0.36                                 | 0.10                                | na<br>(<3 g/L)                      | na<br>(<0.8 g/L)                     | (5)        |
| Sc Type II            | MA-T4        |                                                           | ~15                          | 0.50                            | 7.8                      | 0.34                                 | 0.09                                | na<br>(<3 g/L)                      | na<br>(<0.8 g/L)                     |            |
| IR-2                  | MA-R4        | psXR, psXDH, scXKS1<br>single-copy integration            | ~15                          | 1.07                            | 7.8                      | 0.35                                 | 0.05                                | 0.1                                 | 0.01                                 | (6)        |
| IR-2                  | MA-R5        | psXR, engineered psXDH, scXKS1<br>single-copy integration | ~15                          | 1.49                            | 7.8                      | 0.37                                 | 0.04                                | 0.07                                | 0.01                                 | (6)        |
| INVSc1                | INVSc1-F2    | anidXR, caXDH, scXKS1<br>single-copy plasmid              | 10                           | 0.48                            | 11.0                     | 0.24                                 | 0.01                                | 0.04                                | 0.02                                 | This study |
| CTY                   | CTY-F3       | anidXR, anXDH, pcXKS<br>single-copy plasmid               | 10                           | 0.51                            | 11.6                     | 0.19                                 | 0.07                                | 0.01                                | 0.00                                 | This study |
| ATCC 4124             | ATCC4124-F2  | pgXR, pcXDH, aoXKS<br>single-copy plasmid                 | 10                           | 0.93                            | 13.4                     | 0.27                                 | 0.07                                | 0.01                                | 0.00                                 | This study |
| INVSc1                | INVSc1-F2    | anidXR, caXDH, scXKS<br>single-copy plasmid               | 1                            | 0.39                            | 9.8                      | 0.23                                 | 0.02                                | 0.04                                | 0.02                                 | This study |
| CTY                   | CTY-F3       | anidXR, anXDH, pcXKS<br>single-copy plasmid               | 1                            | 0.54                            | 12.6                     | 0.22                                 | 0.08                                | 0.03                                | 0.00                                 | This study |
| ATCC 4124             | ATCC4124-F2  | pgXR, pcXDH, aoXKS<br>single-copy plasmid                 | 1                            | 0.54                            | 11.5                     | 0.23                                 | 0.06                                | 0.01                                | 0.00                                 | This study |
| ATCC 4124             | ATCC4124-S10 | psXR, psXDH, nhXKS<br>single-copy plasmid                 | 1                            | 0.62                            | 11.2                     | 0.27                                 | 0.03                                | 0.01                                | 0.00                                 | This study |

Continued (Table S6)

| Xylose (80 g/L)                      |               |                                                               |                 |                                 |                          |                         |                                     |                        |                         |            |  |
|--------------------------------------|---------------|---------------------------------------------------------------|-----------------|---------------------------------|--------------------------|-------------------------|-------------------------------------|------------------------|-------------------------|------------|--|
| Host strain                          | Strain        | Phenotype/Genotype                                            | OD <sub>0</sub> | Sugar consumption rate (g/L/hr) | Final biomass (cdw, g/L) | Y <sub>etoh</sub> (g/g) | Y <sub>xyl</sub> (g/g)              | Y <sub>gly</sub> (g/g) | Y <sub>acet</sub> (g/g) | Reference  |  |
| D424-2                               | DA24          | pxXR, engineered psXR, psXDH, scXKS1, single-copy integration | 1               | 1.16                            | ~6                       | 0.34                    | na                                  | na                     | na                      | (4)        |  |
| DA24                                 | DA24-16       | Evolved isolate from DA24                                     | 1               | 1.32                            | ~6                       | 0.35                    | na                                  | na                     | na                      | (4)        |  |
| ATCC 4124                            | ATCC4124-S10  | psXR, psXDH, nhXKS single-copy plasmid                        | 1               | 0.88                            | ~13.8                    | 0.31                    | 0.02                                | 0.03                   | 0.01                    | This study |  |
| Glucose (70 g/L) and xylose (40 g/L) |               |                                                               |                 |                                 |                          |                         |                                     |                        |                         |            |  |
| Host strain                          | Strain        | Phenotype/Genotype                                            | OD <sub>0</sub> | Sugar consumption rate (g/L/hr) | Final biomass (cdw, g/L) | Y <sub>etoh</sub> (g/g) | Y <sub>xyl</sub> <sup>g</sup> (g/g) | Y <sub>gly</sub> (g/g) | Y <sub>acet</sub> (g/g) | Reference  |  |
| Saccharmyces sp.1400                 | 424A (LNH-ST) | psXR, psXDH, scXKS multi-copy integration                     | ~4              | 2.29                            | 9.5                      | 0.43                    | na                                  | na                     | na                      | (3)        |  |
| D424-2                               | DA24          | psXR, engineered psXR, psXDH, scXKS1, single-copy integration | 1               | 1.45                            | Na                       | 0.39                    | na                                  | na                     | na                      | (4)        |  |
| D424-2                               | DA24-16       | Evolved isolate from DA24                                     | 1               | 1.78                            | Na                       | 0.42                    | na                                  | Na                     | na                      | (4)        |  |
| CTY                                  | CTY-F3        | anidXR, anXDH, pcXKS single-copy plasmid                      | 5               | 1.63                            | 13.8                     | 0.39                    | 0.05                                | 0.04                   | 0.02                    | This study |  |

<sup>a</sup> Initial OD (600nm)<sup>b, c, d, e</sup> Ethanol, xylitol, glycerol, and acetate yield per consumed sugar, respectively.<sup>f</sup> Value was not reported.<sup>g</sup> Xylitol yield was calculated per consumed xylose in co-fermentation.

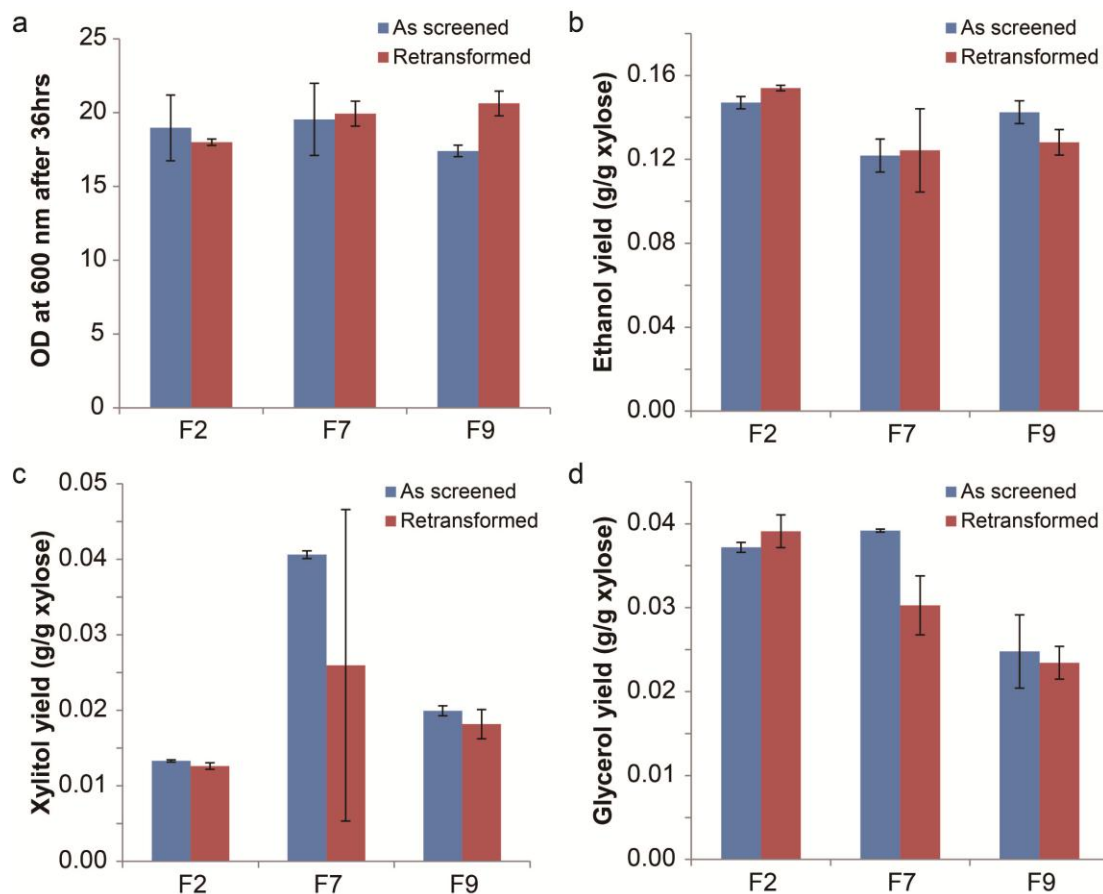

**Figure S1. Growth and xylose utilization of the selected recombinants as screened and after retransformed.** Error bar indicates standard deviation (n=2). Among 10 fast grower screened from INVSc1 library, three recombinants (F2, F7, and F9) were tested for xylose utilization (2% YPX) as screened and after retransformed with fresh host strain. Error bar indicates standard deviation (n=2).

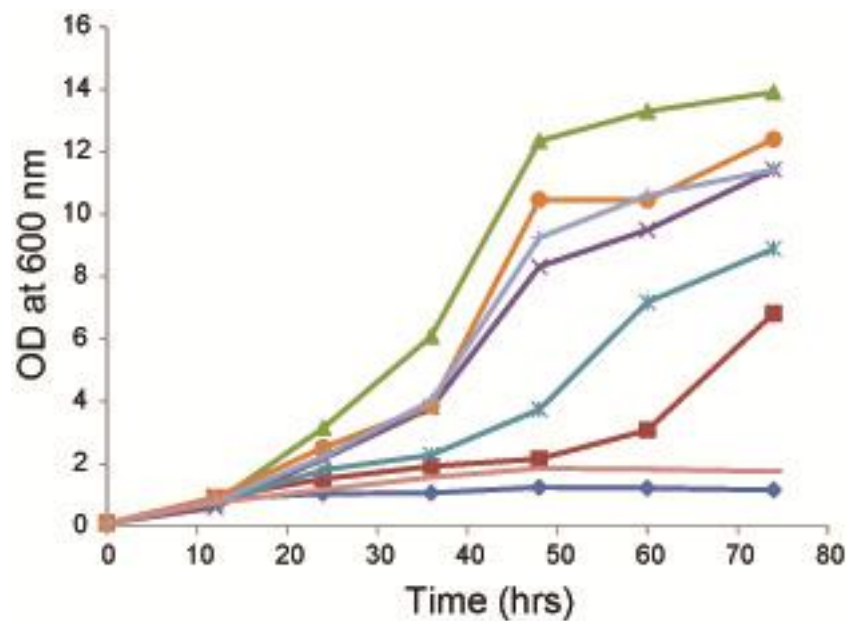

**Figure S2. Diversity in the growth on xylose as a sole carbon source.** Eight clones were randomly picked from the library plate and their growth was determined on complex media containing 2% xylose as a sole carbon source.

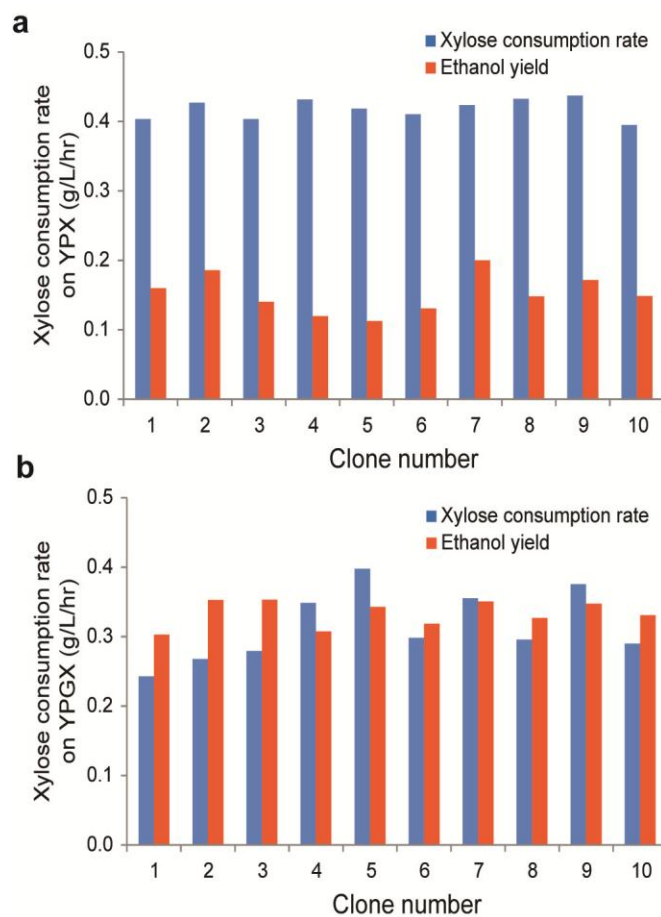

**Figure S3. Screening for single and mixed sugar fermentation.** Volumetric xylose consumption rates and ethanol yields of the fast 10 growers of INVSc1 strain on xylose (2% YPX) and mixed sugar of glucose and xylose (4/4% YPX).

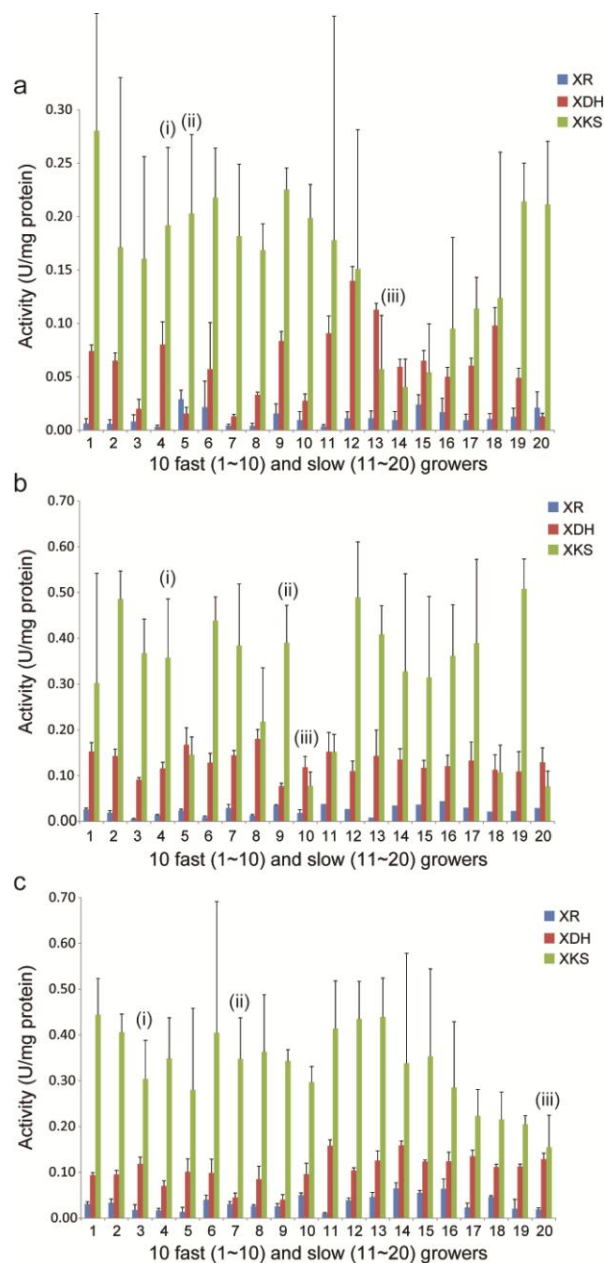

**Figure S4. XR, XDH, and XKS activities in 10 fast and 10 slow growers of INVSc1 (a), ATCC 4124 (b), and CTY strain (c).** Three different activity ratios found more than once were large XDH to XR (>5) and XKS to XDH (>2) ratios, small XDH to XR (<2) and large XKS to XDH (>2) ratios, and large XDH to XR (>5) and small XKS to XDH (<2) ratios. An example of each case is indicated with (i), (ii), and (iii), respectively. Error bar indicates standard deviation (n=3).



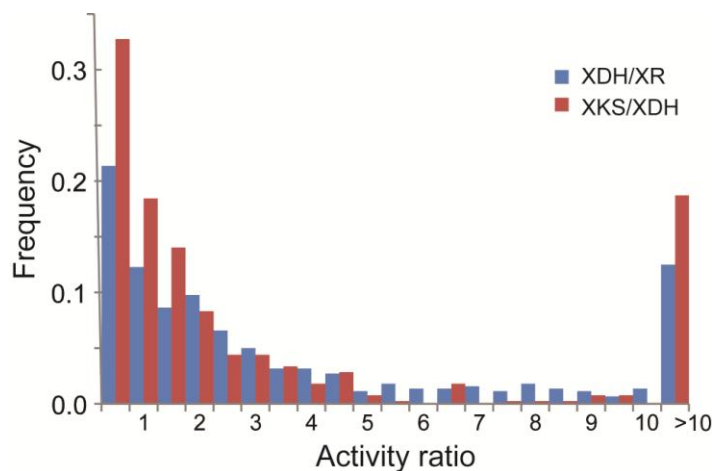

**Figure S5.** The distribution of the enzyme activity ratios in a theoretical library consisting of all possible combinations.

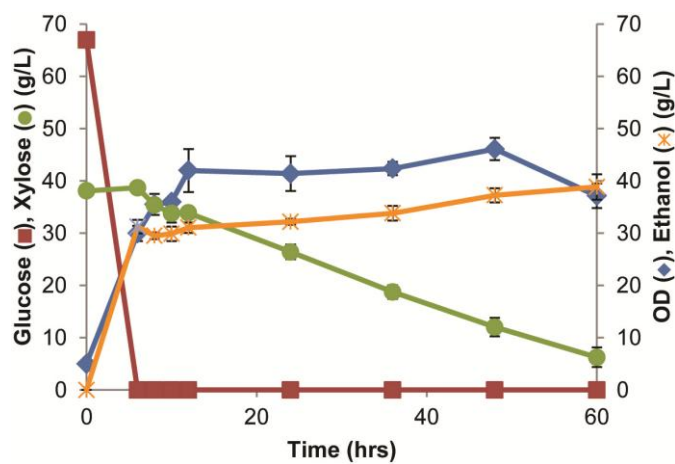

**Figure S6. Glucose and xylose co-fermentation of CTY-F3.** Cofermentation of 70 g/L glucose and 40 g/L xylose by CTY-F3. Cofermentation results were summarized in Table S5. Error bar indicates standard deviation (n=3).

## References

1. **Bae, B., R. P. Sullivan, H. M. Zhao, and S. K. Nair.** 2010. Structure and engineering of L-arabinitol 4-dehydrogenase from *Neurospora crassa*. *J Mol Biol* **402**:230-240.
2. **Bengtsson, O., B. Hahn-Hagerdal, and M. F. Gorwa-Grauslund.** 2009. Xylose reductase from *Pichia stipitis* with altered coenzyme preference improves ethanolic xylose fermentation by recombinant *Saccharomyces cerevisiae*. *Biotechnol Biofuels* **2**.
3. **Dale, B. E., and M. W. Lau.** 2009. Cellulosic ethanol production from AFEX-treated corn stover using *Saccharomyces cerevisiae* 424A(LNH-ST). *Proc Natl Acad Sci USA* **106**:1368-1373.
4. **Ha, S. J., J. M. Galazka, S. R. Kim, J. H. Choi, X. M. Yang, J. H. Seo, N. L. Glass, J. H. D. Cate, and Y. S. Jin.** 2011. Engineered *Saccharomyces cerevisiae* capable of simultaneous cellobiose and xylose fermentation. *Proc Natl Acad Sci USA* **108**:504-509.
5. **Matsushika, A., H. Inoue, K. Murakami, O. Takimura, and S. Sawayama.** 2009. Bioethanol production performance of five recombinant strains of laboratory and industrial xylose-fermenting *Saccharomyces cerevisiae*. *Bioresource Technol* **100**:2392-2398.
6. **Matsushika, A., H. Inoue, S. Watanabe, T. Kodaki, K. Makino, and S. Sawayama.** 2009. Efficient bioethanol production by a recombinant flocculent *Saccharomyces cerevisiae* strain with a genome-integrated NADP<sup>+</sup>-dependent xylitol dehydrogenase gene. *Appl Environ Microb* **75**:3818-3822.
